## CORRECTION

Correction: Vitamin D<sub>4</sub> in Mushrooms

Katherine M. Phillips, Ronald L. Horst, Nicholas J. Koszewski, Ryan R. Simon

There are errors in sentences 3–7 of the Abstract. The correct text is as follows: Vitamin D<sub>4</sub> was present (>0.01 µg/100 g) in a total of 18 composites and in at least one composite of each mushroom type except white button. The level was highest in samples with known UV exposure: vitamin D enhanced portabella, and maitake mushrooms from one supplier (0.02–0.7 and 2.25–3.54 µg/100 g, respectively). Other mushrooms had detectable vitamin D<sub>4</sub> in some but not all samples. In one composite of oyster mushrooms the vitamin D<sub>4</sub> content was about 25% of the vitamin D<sub>2</sub> content (0.63 vs. 2.59 µg/100 g). Vitamin D<sub>4</sub> exceeded 0.2 µg/100 g in the morel and chanterelle mushroom samples that contained D<sub>4</sub>, but was undetectable in two morel samples.

There are multiple errors in the section titled Vitamin D<sub>4</sub> content of mushrooms. The corrected text is as follows.

Paragraph 1, Sentence 2: Overall, vitamin D<sub>4</sub> was detected (>0.01 µg/100 g) in 18 of the total of 38 composites analyzed and was present at an average concentration of 0.52 µg/100 g.

Paragraph 1, Sentences 4–6: There were 7 samples known to contain mushrooms that had been exposed to UV light during production: the Mushroom CC, the vitamin D enhanced portabella, and the two maitake samples from supplier C (Table 1). All of these samples contained vitamin D<sub>4</sub>. The two maitake mushroom samples that were high in vitamin D<sub>2</sub> (63.2 and 48.9 µg/100 g) were also high in vitamin D<sub>4</sub> (3.54 and 2.25 µg/100 g, respectively). These mushrooms were found to have been exposed to UV light based on the growing conditions reported to be used by this producer [26].

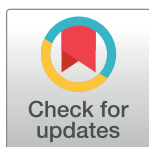**OPEN ACCESS**

**Citation:** Phillips KM, Horst RL, Koszewski NJ, Simon RR (2021) Correction: Vitamin D<sub>4</sub> in Mushrooms. PLoS ONE 16(6): e0253992. <https://doi.org/10.1371/journal.pone.0253992>

**Published:** June 28, 2021

**Copyright:** © 2021 Phillips et al. This is an open access article distributed under the terms of the [Creative Commons Attribution License](https://creativecommons.org/licenses/by/4.0/), which permits unrestricted use, distribution, and reproduction in any medium, provided the original author and source are credited.

Table 1. Vitamin D<sub>4</sub> and pro-vitamin D<sub>4</sub> (22,23-dihydroergosterol; ergosta-5,7-dienol) content of ten types of mushrooms.

| Mushroom                  | Scientific name                                        | NDB no. <sup>a</sup> | Com-<br>posite <sup>b</sup> | Moisture (g/<br>100g) | Vitamin D <sub>4</sub>               |                          |      | Std<br>Err | 22,23-Dihydroergosterol              |                     |
|---------------------------|--------------------------------------------------------|----------------------|-----------------------------|-----------------------|--------------------------------------|--------------------------|------|------------|--------------------------------------|---------------------|
|                           |                                                        |                      |                             |                       | µg/100g fresh<br>weight <sup>c</sup> | Mean                     | SD   |            | mg/100g fresh<br>weight <sup>c</sup> | Mean                |
| White button              | <i>Agaricus bisporus</i>                               | 11260                | 1                           | 92.85                 | -                                    | -                        | -    | -          | 5.97                                 | 6.03 <sup>B,C</sup> |
|                           |                                                        |                      | 2                           | 92.81                 | -                                    | -                        | -    | -          | 5.79                                 |                     |
|                           |                                                        |                      | 3                           | 92.35                 | -                                    | -                        | -    | -          | 5.86                                 |                     |
|                           |                                                        |                      | 4                           | 92.47                 | -                                    | -                        | -    | -          | 6.49                                 |                     |
| Enoki                     | <i>Flammulina velutipes</i>                            | 11950                | A1                          | 87.68                 | -                                    | 0.01 <sup>B</sup>        | 0.02 | 0.01       | 17.0                                 | 16.5 <sup>A</sup>   |
|                           |                                                        |                      | A2                          | 88.47                 | -                                    | -                        | -    | -          | 18.0                                 |                     |
|                           |                                                        |                      | G1                          | 88.28                 | 0.04                                 | -                        | -    | -          | 17.0                                 |                     |
|                           |                                                        |                      | 1                           | 89.30                 | -                                    | -                        | -    | -          | 13.8                                 |                     |
| Shiitake                  | <i>Lentinus edodes</i>                                 | 11238                | 1                           | 86.90                 | 0.03                                 | 0.05 <sup>B</sup>        | 0.05 | 0.02       | 7.31                                 | 6.51 <sup>B,C</sup> |
|                           |                                                        |                      | 2                           | 91.41                 | 0.07                                 | -                        | -    | -          | 7.25                                 |                     |
|                           |                                                        |                      | 3                           | 90.53                 | 0.11                                 | -                        | -    | -          | 6.15                                 |                     |
|                           |                                                        |                      | A1                          | 90.11                 | -                                    | -                        | -    | -          | 5.34                                 |                     |
| Maitake                   | <i>Grifola frondosa</i>                                | 11993                | A1                          | 88.37                 | -                                    | 1.45 <sup>A</sup>        | 1.75 | 0.88       | 8.90                                 | 6.34 <sup>B,C</sup> |
|                           |                                                        |                      | A2                          | 88.59                 | -                                    | -                        | -    | -          | 9.00                                 |                     |
|                           |                                                        |                      | C1                          | 92.30                 | 3.54                                 | -                        | -    | -          | 3.53                                 |                     |
|                           |                                                        |                      | C2                          | 91.92                 | 2.25                                 | -                        | -    | -          | 3.92                                 |                     |
| Oyster                    | <i>Pleurotus ostreatus</i>                             | 11987                | A1                          | 89.70                 | 0.08                                 | 0.18 <sup>A,<br/>B</sup> | 0.30 | 0.15       | 8.55                                 | 8.89 <sup>B</sup>   |
|                           |                                                        |                      | 1                           | 88.77                 | -                                    | -                        | -    | -          | 11.7                                 |                     |
|                           |                                                        |                      | 2                           | 90.38                 | 0.63                                 | -                        | -    | -          | 8.16                                 |                     |
|                           |                                                        |                      | 3                           | 90.54                 | -                                    | -                        | -    | -          | 7.13                                 |                     |
| Crimini                   | <i>Agaricus bisporus</i>                               | 11266                | 1                           | 91.92                 | -                                    | 0.03 <sup>B</sup>        | 0.06 | 0.03       | 5.25                                 | 5.92 <sup>B,C</sup> |
|                           |                                                        |                      | 2                           | 91.22                 | 0.12                                 | -                        | -    | -          | 6.11                                 |                     |
|                           |                                                        |                      | A1                          | 93.08                 | -                                    | -                        | -    | -          | 5.42                                 |                     |
|                           |                                                        |                      | B1                          | 92.07                 | -                                    | -                        | -    | -          | 6.92                                 |                     |
| Portabella                | <i>Agaricus bisporus</i>                               | 11265                | 1                           | 90.96                 | -                                    | 0.01 <sup>B</sup>        | 0.03 | 0.01       | 6.75                                 | 6.18 <sup>B,C</sup> |
|                           |                                                        |                      | 2                           | 92.22                 | -                                    | -                        | -    | -          | 5.45                                 |                     |
|                           |                                                        |                      | 3                           | 91.29                 | 0.05                                 | -                        | -    | -          | 6.53                                 |                     |
|                           |                                                        |                      | 4                           | 91.25                 | -                                    | -                        | -    | -          | 5.97                                 |                     |
| Portabella, uv<br>treated | <i>Agaricus bisporus</i>                               | 11998                | A1                          | 94.86                 | 0.02                                 | 0.36 <sup>A,<br/>B</sup> | 0.32 | 0.16       | 4.57                                 | 4.70 <sup>C</sup>   |
|                           |                                                        |                      | A2                          | 95.12                 | 0.17                                 | -                        | -    | -          | 3.94                                 |                     |
|                           |                                                        |                      | B1                          | 94.76                 | 0.70                                 | -                        | -    | -          | 5.10                                 |                     |
|                           |                                                        |                      | B2                          | 93.68                 | 0.56                                 | -                        | -    | -          | 5.20                                 |                     |
| Chanterelle               | <i>Cantharellus californicus</i> or <i>C. cibarius</i> | 11239                | D1                          | 91.09                 | 0.08                                 | 0.16 <sup>A,<br/>B</sup> | 0.11 | 0.08       | 5.23                                 | 4.49 <sup>C</sup>   |
|                           |                                                        |                      | D2                          | 88.61                 | 0.24                                 | -                        | -    | -          | 3.75                                 |                     |
| Morel                     | <i>Morchella spp.</i>                                  | 11240                | E1                          | 89.46                 | 0.24                                 | 0.11 <sup>B</sup>        | 0.13 | 0.07       | 7.13                                 | 5.79 <sup>B,C</sup> |
|                           |                                                        |                      | E2                          | 90.38                 | 0.22                                 | -                        | -    | -          | 5.75                                 |                     |
|                           |                                                        |                      | F1                          | 89.44                 | -                                    | -                        | -    | -          | 5.31                                 |                     |
|                           |                                                        |                      | F2                          | 89.18                 | -                                    | -                        | -    | -          | 4.98                                 |                     |

<sup>a</sup>Database entry number from United States Department of Agriculture (USDA) National Nutrient Database for Standard Reference [53];

<sup>b</sup>Composites are combinations of samples from statistical sampling locations in the U.S., or retail suppliers, as described in Phillips et al. [14]. Composites designated with the same capital letter were from the same supplier.

<sup>c</sup>—indicates less than the limit of detection (0.01 µg/100 g fresh weight).

<https://doi.org/10.1371/journal.pone.0253992.t001>

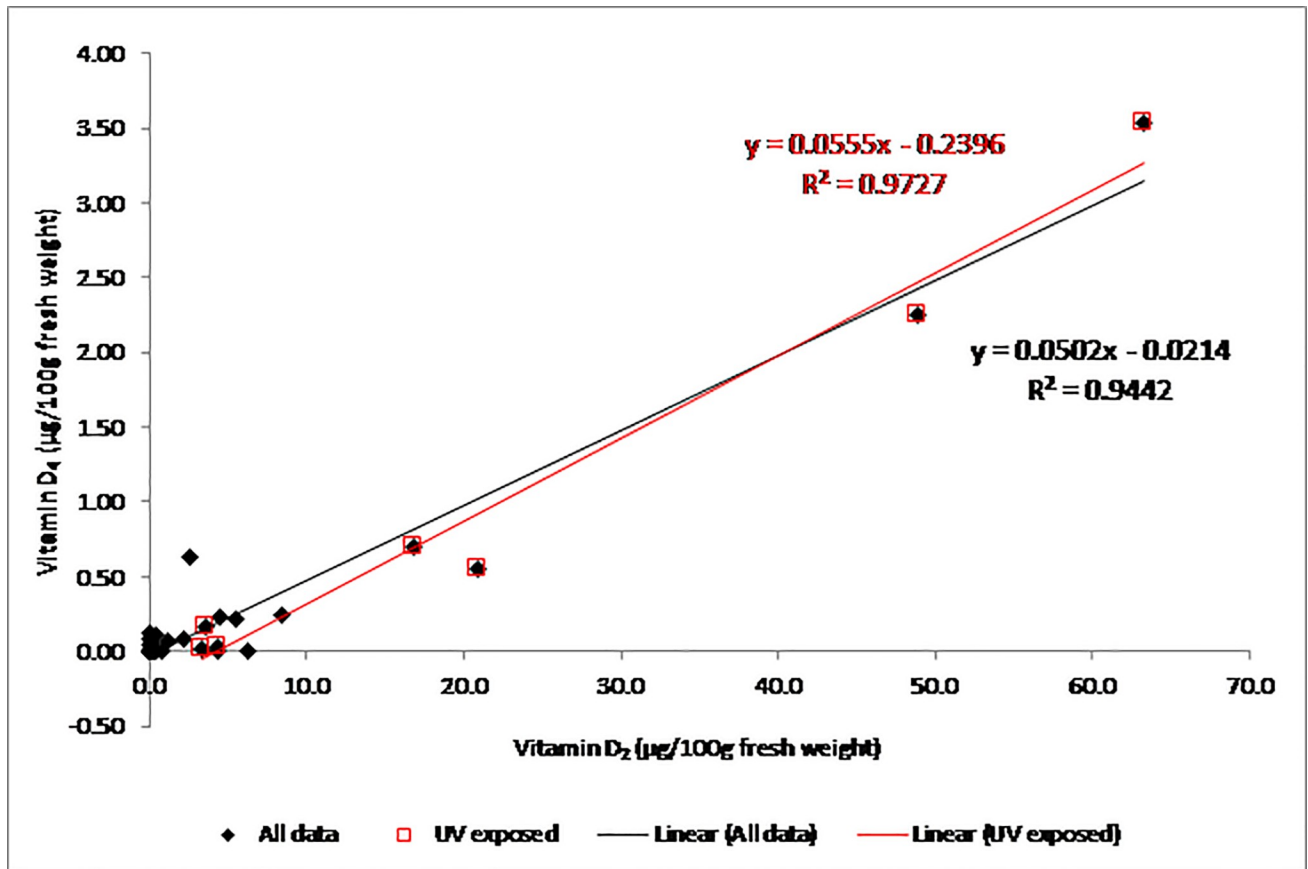

**Fig 4.** Relationship between the vitamin D<sub>4</sub> and vitamin D<sub>2</sub> concentrations in ten types of mushrooms (Table 1). Data for vitamin D<sub>2</sub> were previously reported [14].

<https://doi.org/10.1371/journal.pone.0253992.g001>

Paragraph 1, Sentences 8–9: In oyster mushrooms the composite highest in vitamin D<sub>2</sub> (2.59 µg/100 g) had a vitamin D<sub>4</sub> content approximately 25% of D<sub>2</sub> (0.63 µg/100 g). Vitamin D<sub>4</sub> exceeded 0.2 µg/100 g in the morel and chanterelle mushroom samples that contained D<sub>4</sub> (all but two morel composites).

Paragraph 2, Sentences 2–3: The mean vitamin D<sub>4</sub> concentration in the Mushroom CC samples assayed in this study was 0.014 µg/100g with a standard deviation of 0.0042 µg/100 g (standard error, 0.0008 µg/100 g). Greater precision at higher concentrations would be expected [27].

There are errors in Table 1 and in Fig 4. In Table 1 and Fig 4, the values for vitamin D<sub>4</sub> were off by a factor of 10. The Table 1 caption incorrectly reads “pre-vitamin D<sub>4</sub>” instead of “pro-vitamin D<sub>4</sub>”. Please see the corrected Table 1, Table 1 caption, and Fig 4 below.

## Reference

1. Phillips KM, Horst RL, Koszewski NJ, Simon RR (2012) Vitamin D<sub>4</sub> in Mushrooms. PLoS ONE 7(8): e40702. <https://doi.org/10.1371/journal.pone.0040702> PMID: 22870201
